# Supplementary material for: Thymol: nature's solvent for sustainable hollow fiber fabrication
Source: Royal Society of Chemistry journal article supplement (doi:10.1039/d4gc01961j), 2024-01-01
Supplement: d4gc01961j1.pdf [file d4gc01961j1.pdf]

## Supplementary Information

### Thymol: Nature's solvent for sustainable hollow fiber fabrication

Usman T. Syed<sup>a†</sup>, Lakshmeesha Upadhyaya<sup>a†</sup>, Livia M. D. Loiola<sup>a</sup>, Abdul-Hamid Emwas<sup>b</sup>,  
Alexey Volkov<sup>a</sup>, Suzana P. Nunes<sup>a,c\*</sup>

<sup>a</sup>Environmental Science and Engineering Program, Biological and Environmental Science and Engineering Division (BESE), King Abdullah University of Science and Technology (KAUST), 23955-6900, Thuwal, Saudi Arabia

<sup>b</sup>Core Labs, King Abdullah University of Science and Technology (KAUST), 23955-6900, Thuwal, Saudi Arabia

<sup>c</sup>Chemistry Program and Chemical Engineering Program, Physical Science and Engineering Division (PSE), King Abdullah University of Science and Technology (KAUST), 23955-6900, Thuwal, Saudi Arabia

<sup>†</sup>Authors with equal contribution

\* Corresponding author: Suzana P. Nunes, Email: [suzana.nunes@kaust.edu.sa](mailto:suzana.nunes@kaust.edu.sa)

**Table S1.** Physicochemical properties of the deep eutectic solvent components.

|                                                  | Component A                                                                       | Component B                                                                       |                                                                                    |                                                                                     |
|--------------------------------------------------|-----------------------------------------------------------------------------------|-----------------------------------------------------------------------------------|------------------------------------------------------------------------------------|-------------------------------------------------------------------------------------|
|                                                  | Thymol                                                                            | DL-Menthol                                                                        | Raspberry Ketone                                                                   | Camphor                                                                             |
| Chemical Formula                                 | C <sub>10</sub> H <sub>14</sub> O                                                 | C <sub>10</sub> H <sub>20</sub> O                                                 | C <sub>10</sub> H <sub>12</sub> O <sub>2</sub>                                     | C <sub>10</sub> H <sub>16</sub> O                                                   |
| Chemical structure                               | 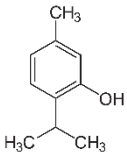 |  |  |  |
| Molar mass (g mol <sup>-1</sup> )                | 150.22                                                                            | 156.27                                                                            | 164.20                                                                             | 152.24                                                                              |
| Boiling temperature (°C)                         | 232                                                                               | 216                                                                               | 140 – 146                                                                          | 204                                                                                 |
| Melting temperature (°C)                         | 49 – 51                                                                           | 34 – 36                                                                           | 82 – 84                                                                            | 175 – 177                                                                           |
| Density (g mL <sup>-1</sup> at 25 °C)            | 0.965                                                                             | 0.890                                                                             | 1.046                                                                              | 0.992                                                                               |
| Solubility in water (g L <sup>-1</sup> at 25 °C) | 0.98                                                                              | 0.42                                                                              | 0.15                                                                               | 1.25                                                                                |

<https://www.sigmaaldrich.com/SA/en>; <https://pubchem.ncbi.nlm.nih.gov/>

**Table S2.** Effect of deep eutectic solvents components molar ratio on the solubilization of Ultem®.

| Component A | Component B      | Ratio (mol/mol) | Solubilization of 13 wt% Ultem® |
|-------------|------------------|-----------------|---------------------------------|
| Thymol      | DL-Menthol       | 4:1             | Yes                             |
|             |                  | 1:1             | Yes (>48 h)                     |
|             |                  | 1:4             | No                              |
|             | Raspberry Ketone | 4:1             | Yes                             |
|             |                  | 1:1             | No                              |
|             |                  | 1:4             | No                              |
|             | Camphor          | 4:1             | Yes                             |
|             |                  | 1:1             | No                              |
|             |                  | 1:4             | No                              |

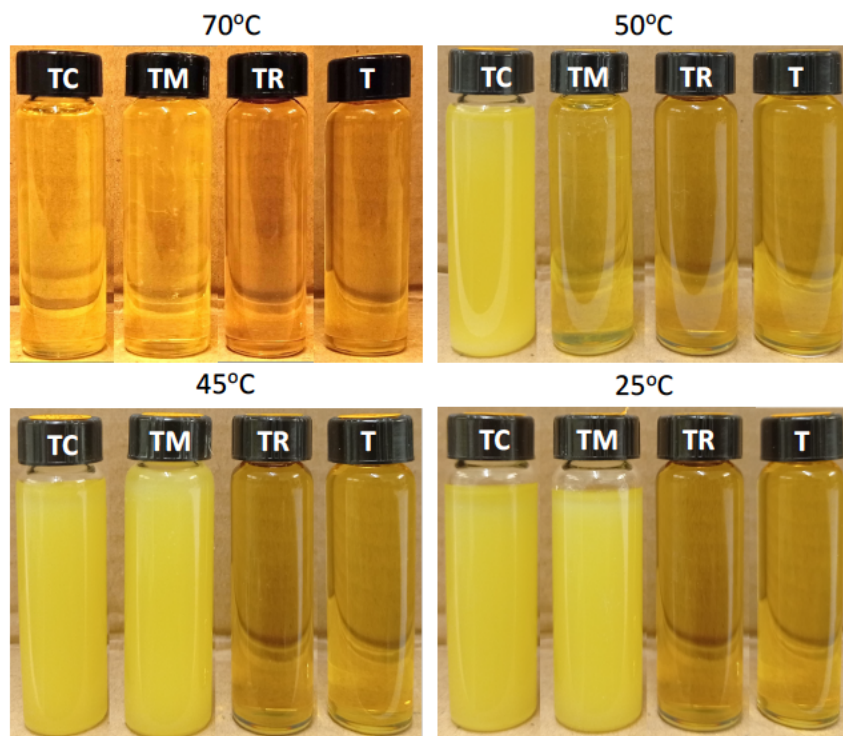

**Figure S1 Solubilization of 13 wt% Ultem®.** 4:1 (molar) thymol/camphor (TC), thymol/menthol (TM), thymol/raspberry ketone (TR) and pure thymol (T) at various temperatures.

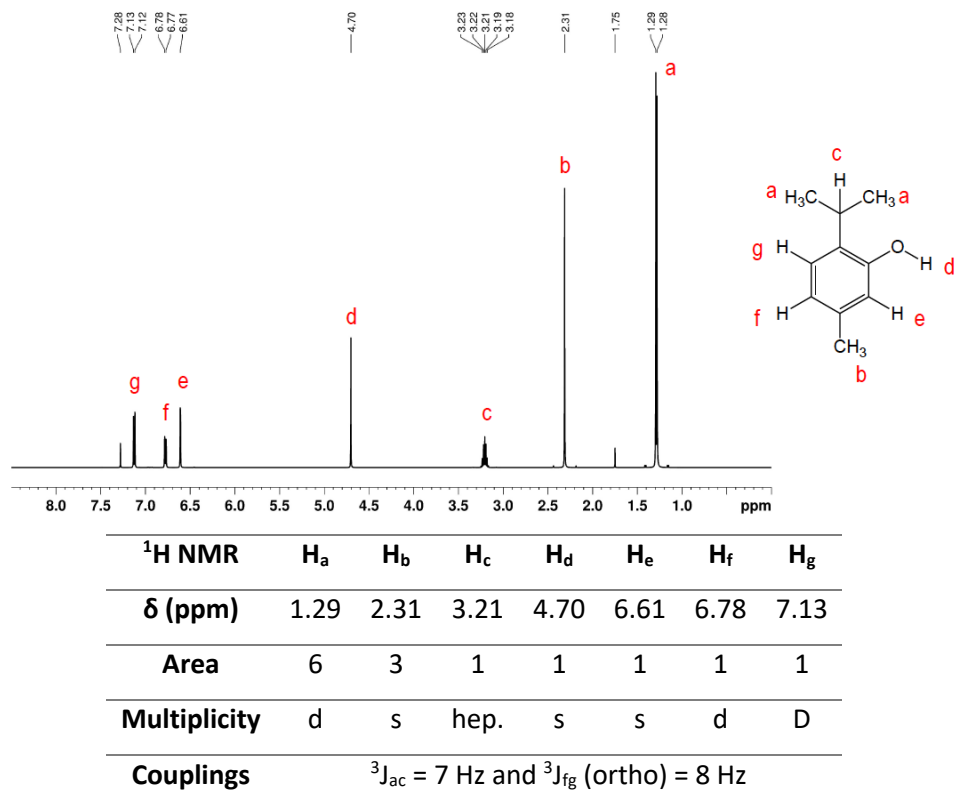

Figure S2. Spectroscopic analysis of thymol. 600MHz <sup>1</sup>H NMR spectrum with peak assignments.



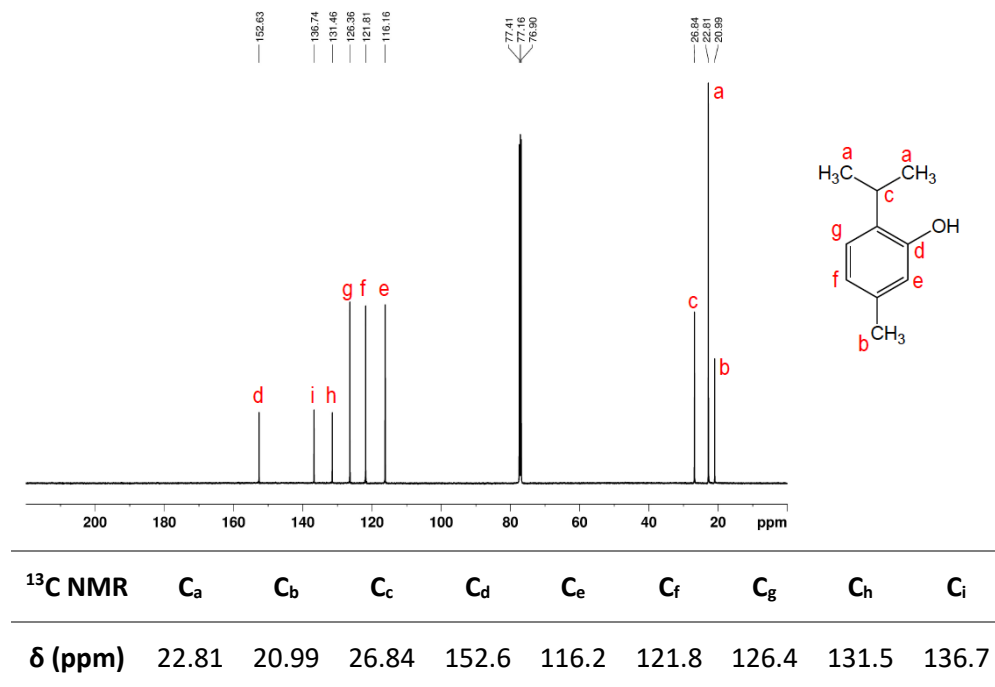

**Figure S3. Spectroscopic analysis of thymol.** 600MHz  $^{13}\text{C}$  NMR spectrum with peaks assignments.

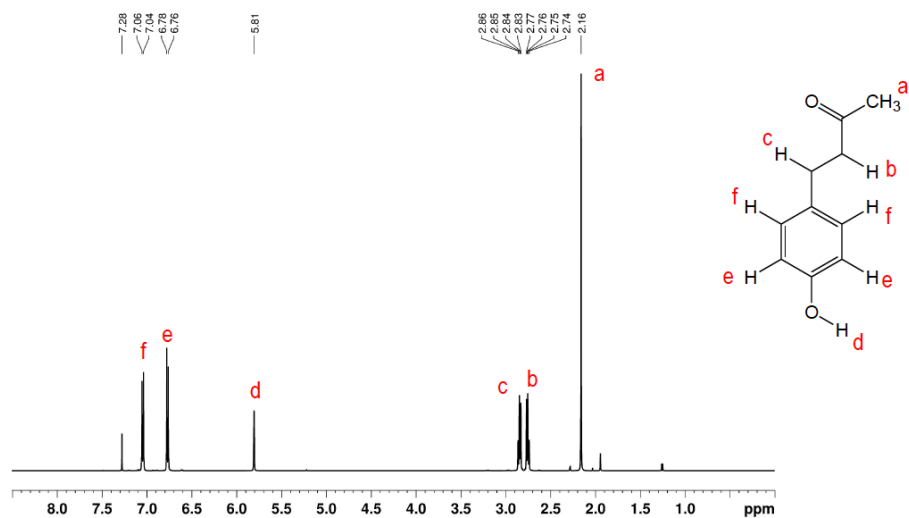

| <sup>1</sup> H NMR | H <sub>a</sub>                                                                          | H <sub>b</sub> | H <sub>c</sub> | H <sub>d</sub> | H <sub>e</sub> | H <sub>f</sub> |
|--------------------|-----------------------------------------------------------------------------------------|----------------|----------------|----------------|----------------|----------------|
| δ (ppm)            | 2.16                                                                                    | 2.76           | 2.85           | 5.81           | 6.77           | 7.05           |
| Area               | 3                                                                                       | 2              | 2              | 1              | 2              | 2              |
| Multiplicity       | s                                                                                       | t              | t              | s              | d              | d              |
| Couplings          | <sup>3</sup> J <sub>bc</sub> = 7.3 Hz and <sup>3</sup> J <sub>ef</sub> (ortho) = 8.5 Hz |                |                |                |                |                |

**Figure S4. Spectroscopic analysis of raspberry ketone.** 600 MHz <sup>1</sup>H NMR spectrum with peak assignments.

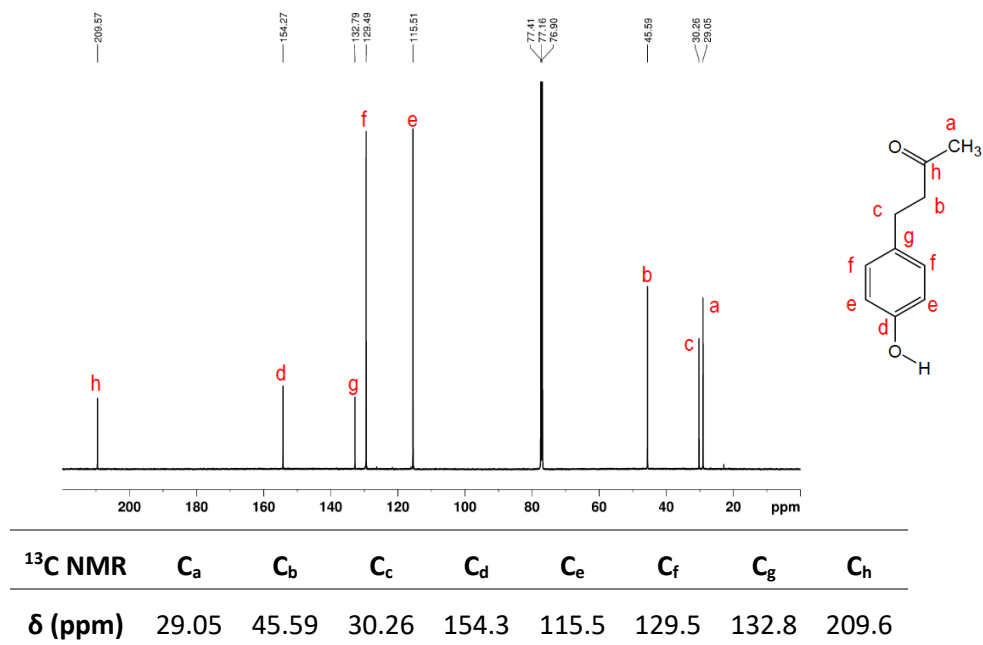

**Figure S5. Spectroscopic analysis of raspberry ketone.** The 600MHz  $^{13}\text{C}$  NMR spectrum with peaks assignments.

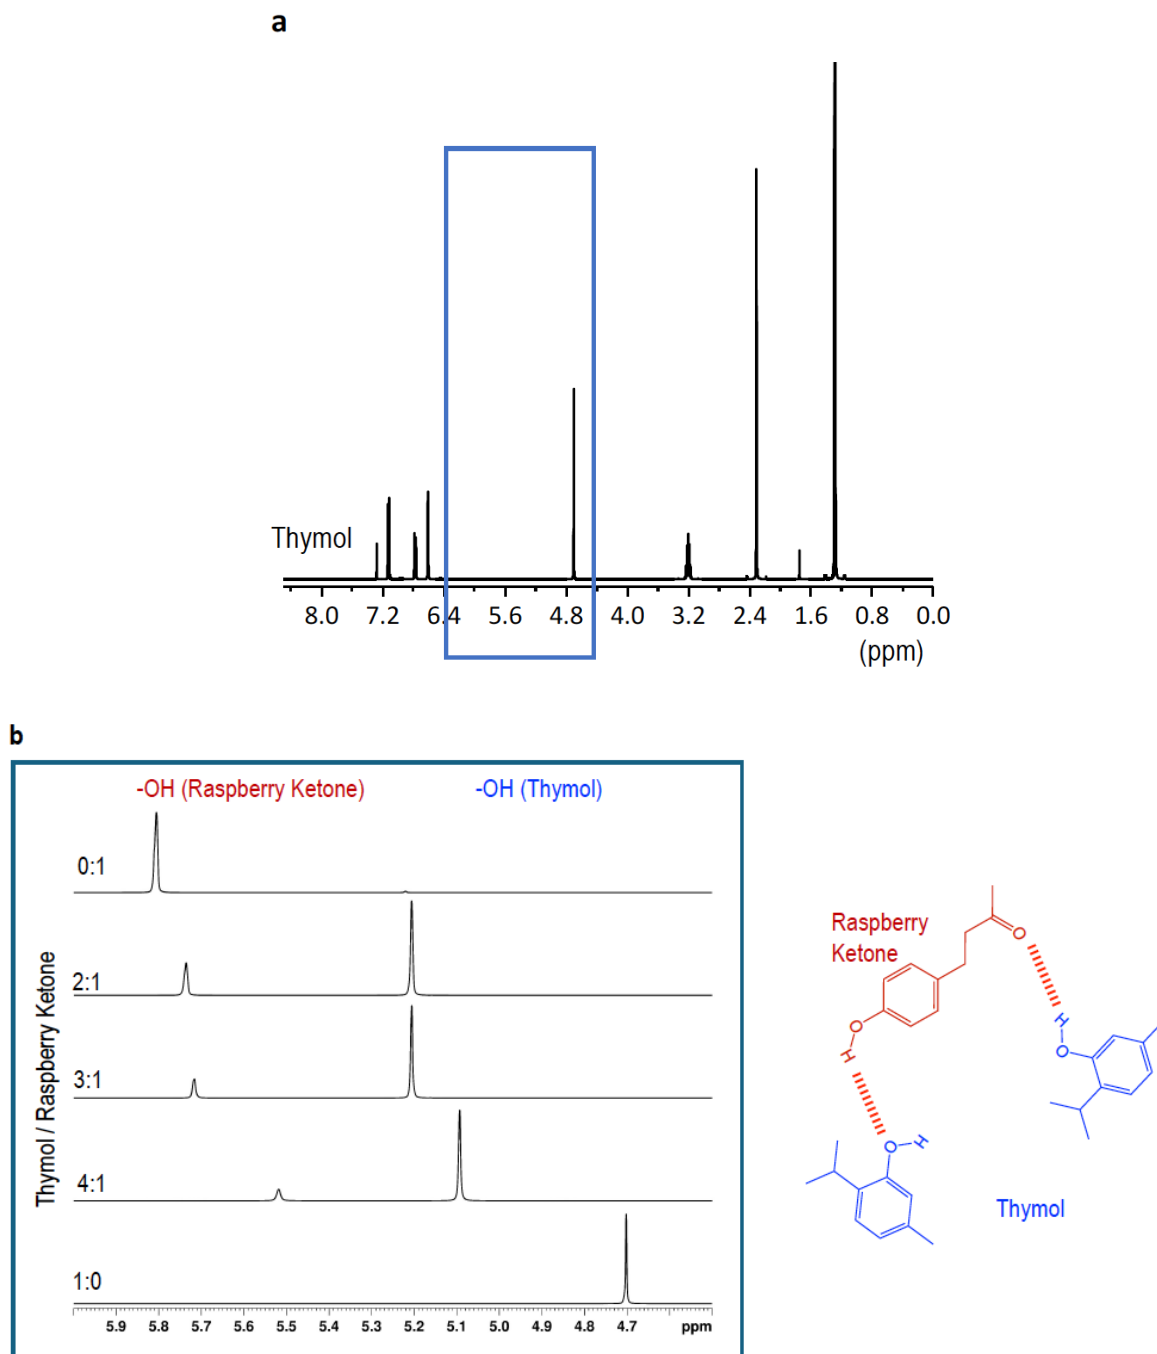

**Figure S6. Deep eutectic solvents spectroscopic analysis.**  $^1\text{H}$  NMR spectra: **a**, Thymol in  $\text{CDCl}_3$  (0-8 ppm). **b**, Peaks relative to OH groups of thymol (4.6-5.3 ppm) and raspberry ketone (5.3-5.9 ppm) mixed in different ratios and scheme of H-bond interactions.

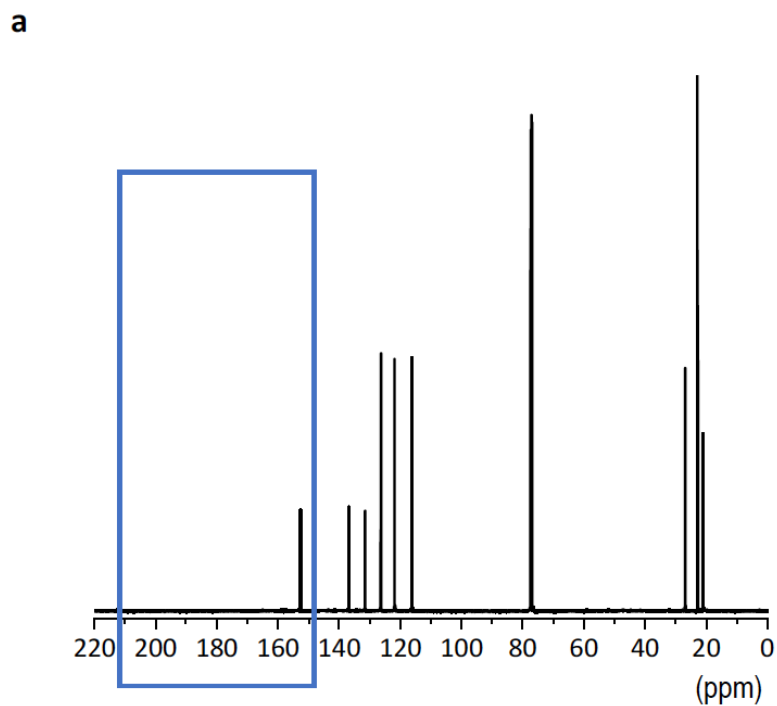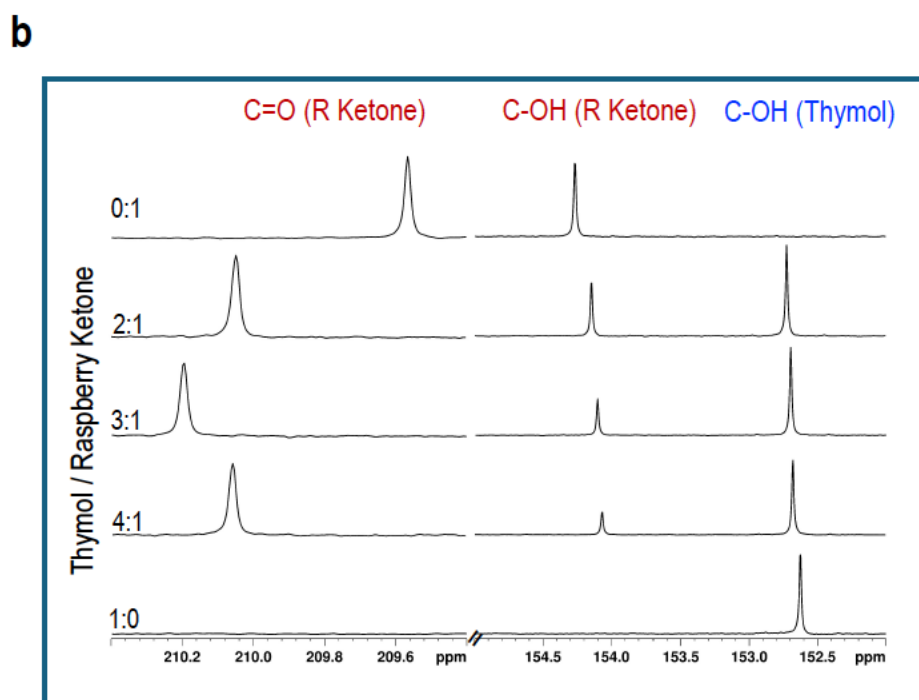

**Figure S7. Deep eutectic solvents spectroscopic analysis.**  $^{13}\text{C}$  NMR spectra. **a**, Thymol in  $\text{CDCl}_3$  (0-220 ppm). **b**, Peaks relative to C-OH groups of thymol (152-153 ppm) and raspberry ketone (153-155 ppm), and C=O group of raspberry ketone (209.4-210.3 ppm) for mixtures of different component ratios.

**Table S3. Spectroscopic analysis.**  $^1\text{H}$  NMR and  $^{13}\text{C}$  NMR chemical shifts for Ultem<sup>®</sup>, thymol, raspberry ketone, and mixtures therefrom.

| $^1\text{H}$ NMR<br>(4.6-6.3 ppm)                     | Thymol       |                         | Raspberry Ketone |                         |
|-------------------------------------------------------|--------------|-------------------------|------------------|-------------------------|
|                                                       | –OH<br>(ppm) | $\Delta\delta$<br>(ppm) | –OH<br>(ppm)     | $\Delta\delta$<br>(ppm) |
| Thymol                                                | 4.70         | -                       | -                | -                       |
| Raspberry Ketone                                      | -            | -                       | 5.81             | -                       |
| 1:1 Thymol/<br>Raspberry Ketone                       | 5.51         | 0.81                    | 6.21             | 0.41                    |
| 2:1 Thymol/<br>Raspberry Ketone                       | 5.21         | 0.50                    | 5.74             | -0.07                   |
| 3:1 Thymol/<br>Raspberry Ketone                       | 5.21         | 0.50                    | 5.72             | -0.09                   |
| 4:1 Thymol/<br>Raspberry Ketone                       | 5.09         | 0.39                    | 5.52             | -0.29                   |
| Ultem <sup>®</sup> in Thymol                          | 5.06         | 0.36                    | -                | -                       |
| Ultem <sup>®</sup> in 4:1 Thymol/<br>Raspberry Ketone | 5.04         | 0.33                    | 5.40             | -0.41                   |

  

| $^{13}\text{C}$ NMR<br>(152-211 ppm)                  | Thymol        |                         | Raspberry Ketone |                         |              |                         |
|-------------------------------------------------------|---------------|-------------------------|------------------|-------------------------|--------------|-------------------------|
|                                                       | C–OH<br>(ppm) | $\Delta\delta$<br>(ppm) | C–OH<br>(ppm)    | $\Delta\delta$<br>(ppm) | C=O<br>(ppm) | $\Delta\delta$<br>(ppm) |
| Thymol                                                | 152.63        | -                       | -                | -                       | -            | -                       |
| Raspberry Ketone                                      | -             | -                       | 154.27           | -                       | 209.57       | -                       |
| 1:1 Thymol/<br>Raspberry Ketone                       | 152.79        | 0.16                    | 154.23           | -0.03                   | 210.37       | 0.80                    |
| 2:1 Thymol/<br>Raspberry Ketone                       | 152.73        | 0.10                    | 154.15           | -0.12                   | 210.05       | 0.48                    |
| 3:1 Thymol/<br>Raspberry Ketone                       | 152.70        | 0.07                    | 154.10           | -0.16                   | 210.20       | 0.63                    |
| 4:1 Thymol/<br>Raspberry Ketone                       | 152.68        | 0.05                    | 154.07           | -0.20                   | 210.06       | 0.49                    |
| Ultem <sup>®</sup> in Thymol                          | 152.60        | 0.02                    | -                | -                       | -            | -                       |
| Ultem <sup>®</sup> in 4:1 Thymol/<br>Raspberry Ketone | 152.71        | 0.09                    | 154.10           | -0.16                   | 209.48       | -0.08                   |

  

| $^{13}\text{C}$ NMR<br>(112-167 ppm)                  | Ultem <sup>®</sup> |                         |              |                         |
|-------------------------------------------------------|--------------------|-------------------------|--------------|-------------------------|
|                                                       | C–O<br>(ppm)       | $\Delta\delta$<br>(ppm) | C=O<br>(ppm) | $\Delta\delta$<br>(ppm) |
| Ultem <sup>®</sup>                                    | 152.77             | -                       | 166.51       | -                       |
| Ultem <sup>®</sup> in Thymol                          | 152.71             | -0.06                   | 166.84       | 0.32                    |
| Ultem <sup>®</sup> in 4:1 Thymol/<br>Raspberry Ketone | 152.75             | -0.03                   | 166.67       | 0.15                    |

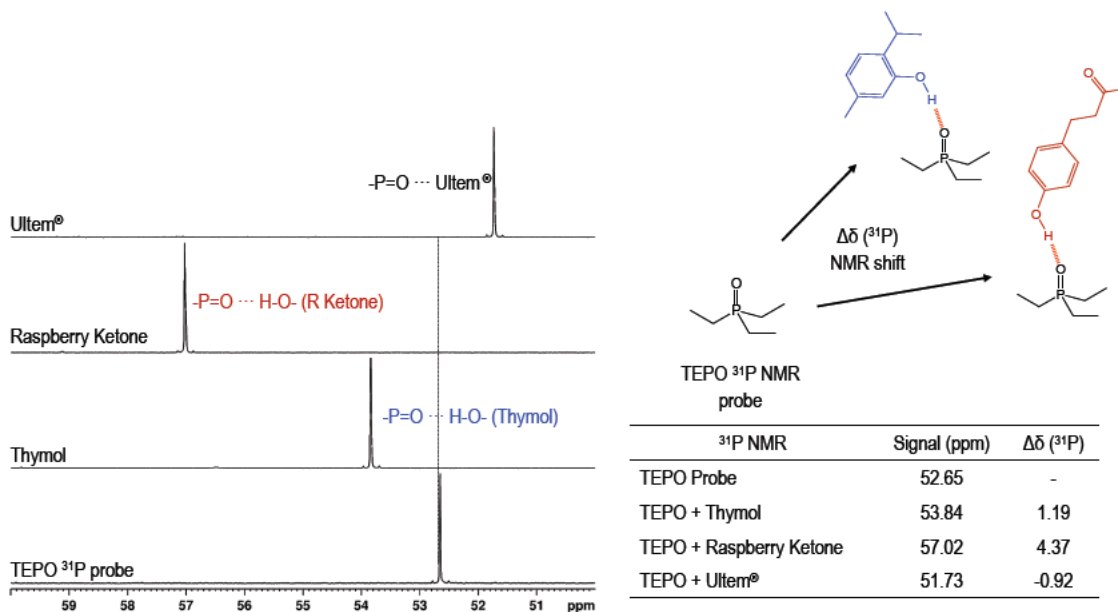

**Figure S8. Hydrogen bond donor-acceptor spectroscopic analysis.** <sup>31</sup>P NMR spectra of triethyl phosphine oxide (TEPO) mixed with Ultem®, raspberry ketone or thymol.

### Hansen solubility parameters

To theoretically predict the solubility of Ultem® in various solvents, the Hansen solubility parameters and the solubility parameter distance  $R_a$  were estimated. Initially, the Hansen solubility parameters of the various individual compounds ( $\delta$ ) and the mixtures ( $\delta_M^{mix}$ ) were calculated as shown in equations 1 and 2 respectively.

$$\delta^2 = \delta_D^2 + \delta_P^2 + \delta_H^2 \quad (1)$$

where  $\delta_D$ ,  $\delta_P$  and  $\delta_H$  were the components of the Hansen solubility parameter related to the dispersive, dipole-dipole and hydrogen bonding interactions, respectively.

$$\delta_M^{mix} = \alpha\delta_M^1 + (1 - \alpha)\delta_M^2 \quad (2)$$

where  $\delta_M^1$  or  $\delta_M^2$  could be  $\delta_D$ ,  $\delta_P$  or  $\delta_H$  of components 1 or 2 and  $\alpha$  was the volume fraction of component 1.

The similarity of a potential solvent (component 1) and the polymer (component 2) was quantified by evaluating the solubility parameter distance,  $R_a$ , as per the following equation 3.

$$R_a = \sqrt{[4(\delta_{D2} - \delta_{D1})^2 + (\delta_{P2} - \delta_{P1})^2 + (\delta_{H2} - \delta_{H1})^2]} \quad (3)$$

### Critical Entanglement Concentration ( $C^*$ ) calculation

To experimentally understand the appropriate solvents for preparing dope solutions, diluted Ultem® solutions (0.05, 0.1 and 0.2 w/v %) were prepared in DES, thymol, NMP and DMF. Their relative and reduced viscosities were measured at 25°C (for DES, NMP and DMF) and at 50°C (for thymol) using an Ubbelohde viscometer (Lauda iVisc, Germany). The intrinsic viscosity  $[\eta]$  of the polymer solutions were calculated from the measured viscosities (at different polymer concentrations) by the following equation:

$$[\eta] = \lim_{c \rightarrow 0} \left( \frac{\eta_{rel} - 1}{C} \right) = \lim_{c \rightarrow 0} \eta_{red} \quad (4)$$

where  $C$  is the concentration of the polymer solution

$$\text{relative viscosity, } \eta_{rel} = \frac{\text{polymer solution dynamic viscosity}}{\text{solvent dynamic viscosity}} \quad (5)$$

$$\text{reduced viscosity, } \eta_{red} = \frac{\eta_{rel} - 1}{C} \quad (6)$$

The concentration at which the polymer coils start to entangle,  $C^*$ , was further calculated from the intrinsic viscosity by the following equation:

$$C^* = \frac{1}{\eta} \quad (7)$$



**Table S4.** Theoretical calculations of Hansen solubility parameters<sup>1,2</sup>.

| Component                       | Molar mass<br>(g mol <sup>-1</sup> ) | Density<br>(g mL <sup>-1</sup> )<br>at 25°C | Hansen Solubility Parameter (MPa <sup>1/2</sup> ) |                               |                                    |              | R <sub>a</sub> of<br>Ultem®<br>with<br>solvents |
|---------------------------------|--------------------------------------|---------------------------------------------|---------------------------------------------------|-------------------------------|------------------------------------|--------------|-------------------------------------------------|
|                                 |                                      |                                             | Dispersion<br>(δ <sub>d</sub> )                   | Polarity<br>(δ <sub>p</sub> ) | H-<br>bonding<br>(δ <sub>h</sub> ) | Total<br>(δ) |                                                 |
| Ultem®                          | 606.67                               | 1.27                                        | 21.1                                              | 6.7                           | 8.1                                | 23.6         | -                                               |
| Thymol                          | 150.22                               | 0.96                                        | 19.0                                              | 4.5                           | 10.8                               | 22.3         | 5.5                                             |
| DL-Menthol                      | 156.27                               | 0.89                                        | 16.6                                              | 4.7                           | 10.6                               | 20.2         | 9.6                                             |
| D-Camphor                       | 152.24                               | 0.99                                        | 17.8                                              | 9.4                           | 4.7                                | 20.7         | 7.9                                             |
| Raspberry Ketone                | 164.20                               | 1.03                                        | 18.7                                              | 7.6                           | 9.7                                | 22.4         | 5.1                                             |
| NMP                             | 99.13                                | 1.03                                        | 18.0                                              | 12.3                          | 7.2                                | 23.0         | 8.4                                             |
| DMF                             | 73.10                                | 0.94                                        | 17.4                                              | 13.7                          | 11.3                               | 24.9         | 10.7                                            |
| DMSO                            | 78.13                                | 1.10                                        | 18.4                                              | 16.4                          | 10.2                               | 26.7         | 11.3                                            |
| DMAc                            | 87.12                                | 0.94                                        | 16.8                                              | 11.5                          | 10.2                               | 22.8         | 10.1                                            |
| 4:1 Thymol/<br>DL-Menthol       | 156.27                               | 0.95                                        | 18.5                                              | 4.5                           | 10.8                               | 21.9         | 6.3                                             |
| 4:1 Thymol/<br>Camphor          | 152.24                               | 0.97                                        | 18.8                                              | 5.5                           | 9.6                                | 21.8         | 5.1                                             |
| 4:1 Thymol/<br>Raspberry Ketone | 164.20                               | 0.97                                        | 18.9                                              | 5.1                           | 10.6                               | 22.3         | 5.2                                             |

$$R_a^2 = 4(\Delta\delta_d)^2 + (\Delta\delta_p)^2 + (\Delta\delta_h)^2$$

<sup>1</sup>Hansen CM. Hansen solubility parameters: a user's handbook. CRC press (2007).

<sup>2</sup>Chung, T.-S. and Z.-L. Xu, J. Membr. Sci., 1998, 147, 35-47.

NMP: N-methyl pyrrolidone; DMF: N, N-dimethyl formamide; DMSO: dimethyl sulfoxide; DMAc: dimethyl acetamide.

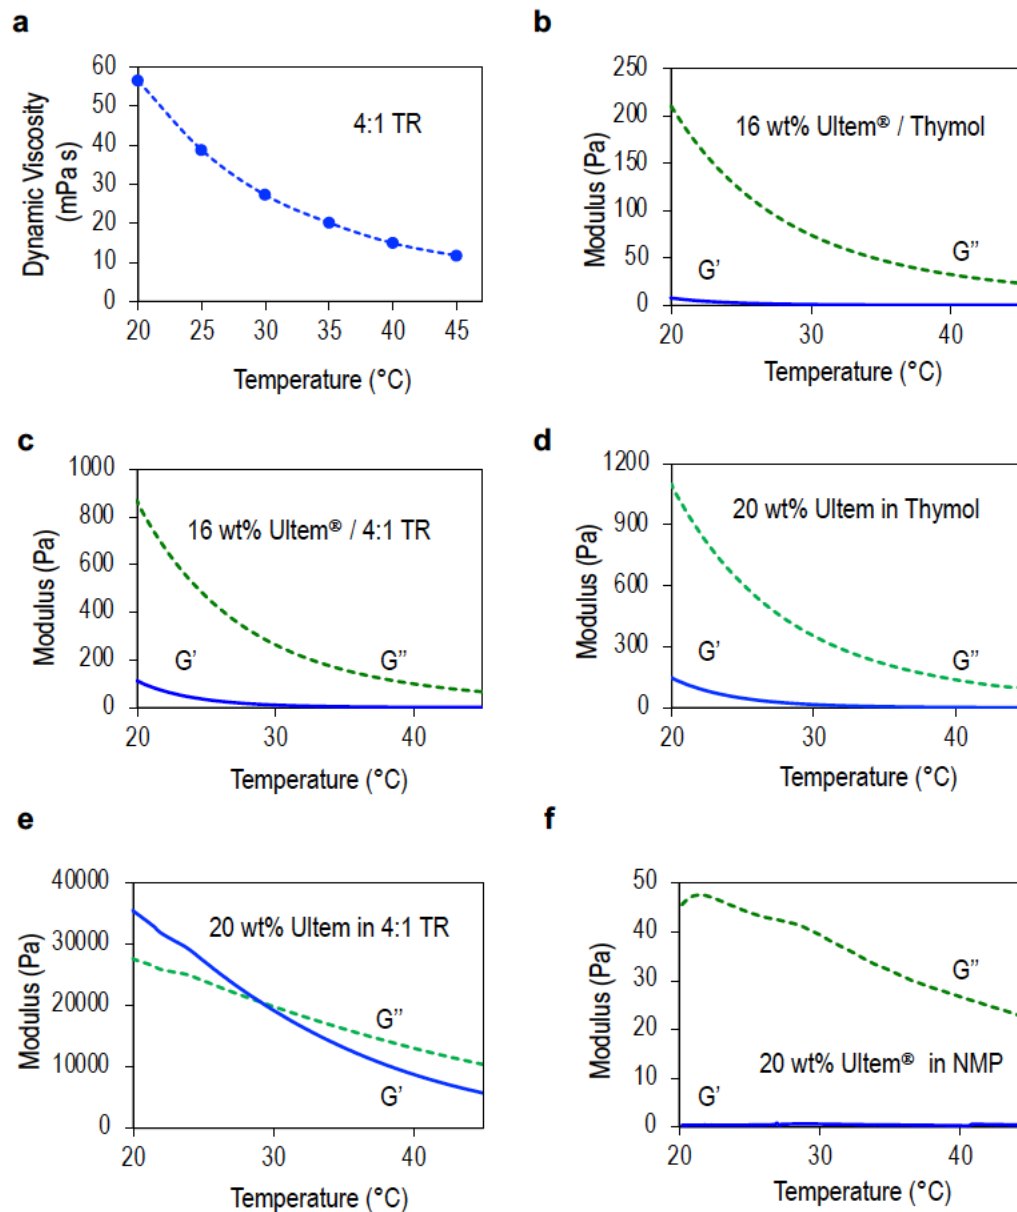

**Figure S9. Dope solution rheology.** **a**, Dynamic viscosity of a mixture of 4:1 thymol/raspberry ketone. **b-f** Storage (blue, solid line) and loss (green, dashed line) moduli. Ultem® solutions in different solvents: **b**, 16 wt% in thymol; **c**, 16 wt% in 4:1 thymol/raspberry ketone (TR); **d**, 20 wt% in thymol; **e**, 20 wt% in thymol/raspberry ketone (TR); **f**, 20 wt% in NMP.

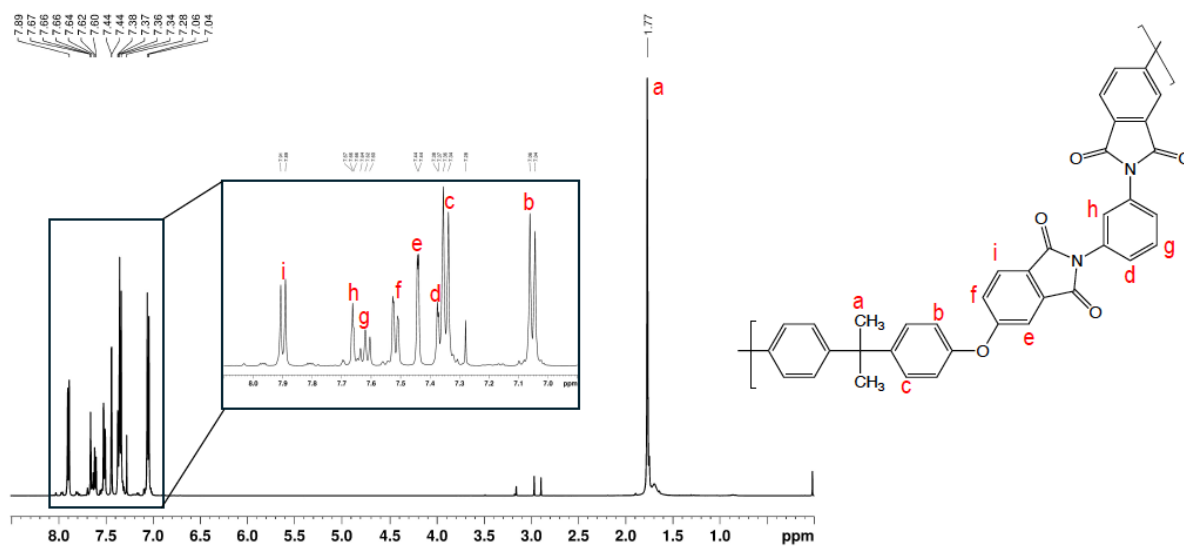

| <sup>1</sup> H NMR | H <sub>a</sub> | H <sub>b</sub>                                                                                                                                                                                                                            | H <sub>c</sub> | H <sub>d</sub> | H <sub>e</sub> | H <sub>f</sub> | H <sub>g</sub> | H <sub>h</sub> | H <sub>i</sub> |
|--------------------|----------------|-------------------------------------------------------------------------------------------------------------------------------------------------------------------------------------------------------------------------------------------|----------------|----------------|----------------|----------------|----------------|----------------|----------------|
| δ (ppm)            | 1.77           | 7.05                                                                                                                                                                                                                                      | 7.35           | 7.37           | 7.44           | 7.52           | 7.62           | 7.67           | 7.90           |
| Multiplicity       | s              | d                                                                                                                                                                                                                                         | d              | dd             | d              | dd             | t              | T              | d              |
| Couplings          |                | <sup>3</sup> J <sub>bc</sub> (ortho) = 8.7 Hz; <sup>3</sup> J <sub>dg</sub> (ortho) = 8.0 Hz; <sup>3</sup> J <sub>fi</sub> (ortho) = 8.3 Hz<br><sup>4</sup> J <sub>dh</sub> (meta) = 1.8 Hz; <sup>4</sup> J <sub>ef</sub> (meta) = 2.0 Hz |                |                |                |                |                |                |                |

**Figure S10. Spectroscopic analysis of Ultem®.** 600 MHz <sup>1</sup>H NMR spectrum and peaks assignments.

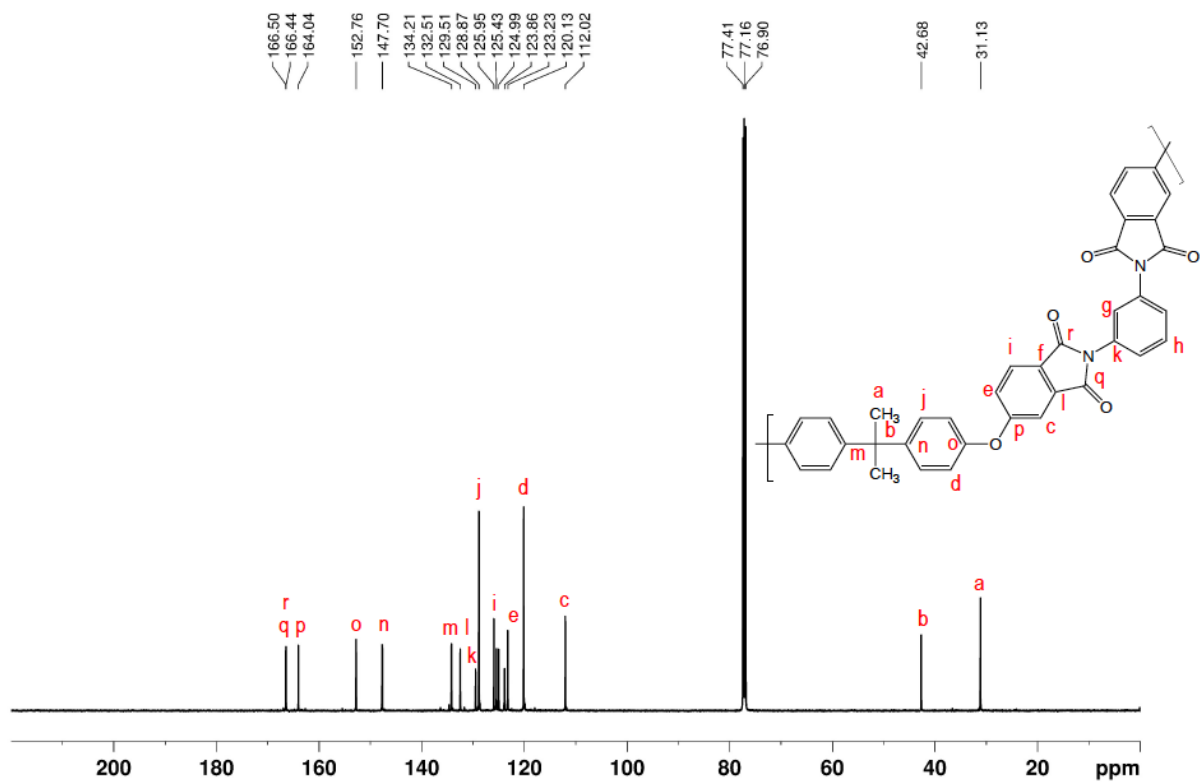

|                     |                |                |                |                |                |                |                |                |                |
|---------------------|----------------|----------------|----------------|----------------|----------------|----------------|----------------|----------------|----------------|
| <sup>13</sup> C NMR | C <sub>a</sub> | C <sub>b</sub> | C <sub>c</sub> | C <sub>d</sub> | C <sub>e</sub> | C <sub>f</sub> | C <sub>g</sub> | C <sub>h</sub> | C <sub>i</sub> |
| δ (ppm)             | 31.13          | 42.68          | 112.0          | 120.1          | 123.2          | 123.9          | 125.0          | 125.4          | 126.0          |
| <sup>13</sup> C NMR | C <sub>j</sub> | C <sub>k</sub> | C <sub>l</sub> | C <sub>m</sub> | C <sub>n</sub> | C <sub>o</sub> | C <sub>p</sub> | C <sub>q</sub> | C <sub>r</sub> |
| δ (ppm)             | 128.9          | 129.5          | 132.5          | 134.2          | 147.7          | 152.8          | 164.0          | 166.5          | 166.5          |

**Figure S11. Spectroscopic analysis of Ultem®.** 600 MHz <sup>13</sup>C NMR spectrum and peak assignments.

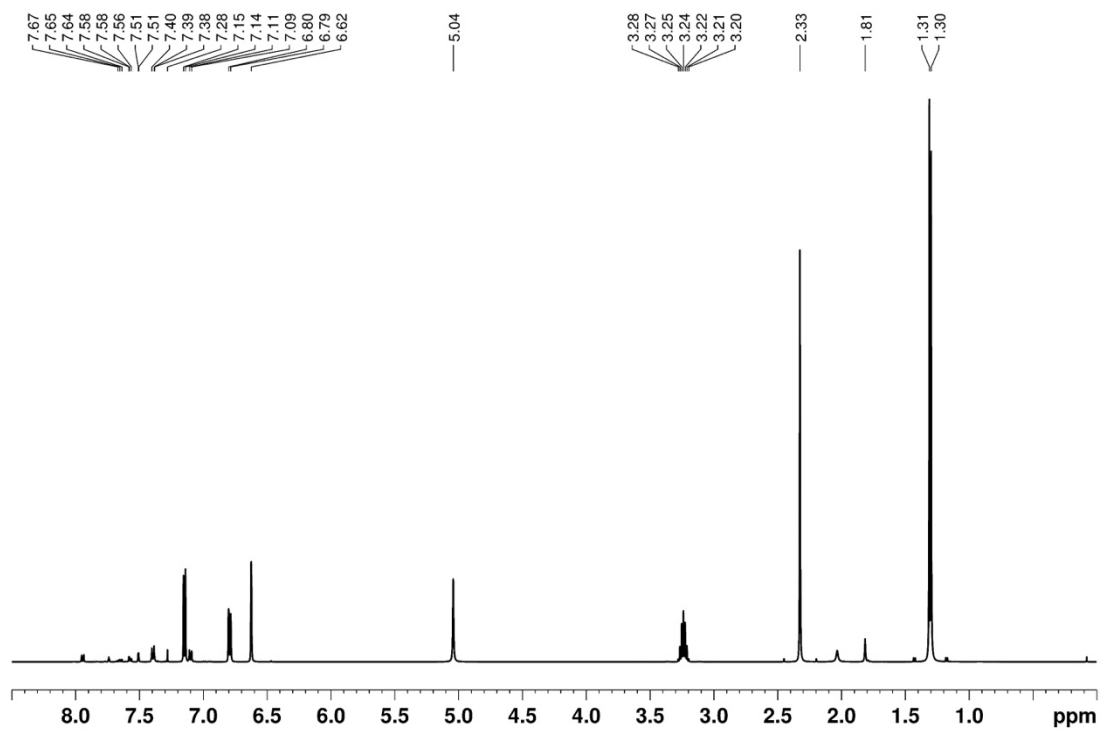

Figure S12. Spectroscopic analysis of 20 wt% Ultem<sup>®</sup> solution in thymol. 600 MHz <sup>1</sup>H NMR spectrum.

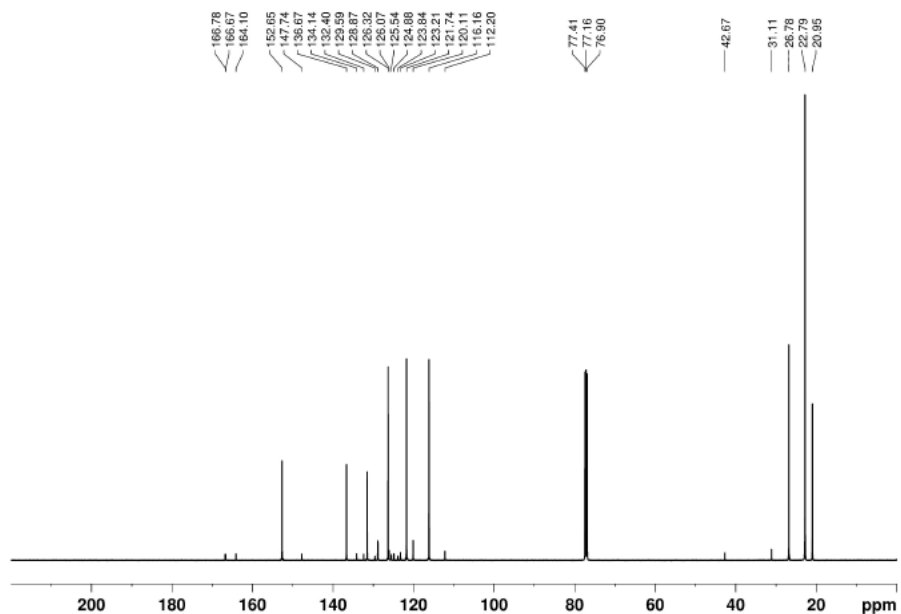

Figure S13. Spectroscopic analysis of 20 wt% of Ultem<sup>®</sup> solution in thymol. 600 MHz <sup>13</sup>C NMR spectrum.

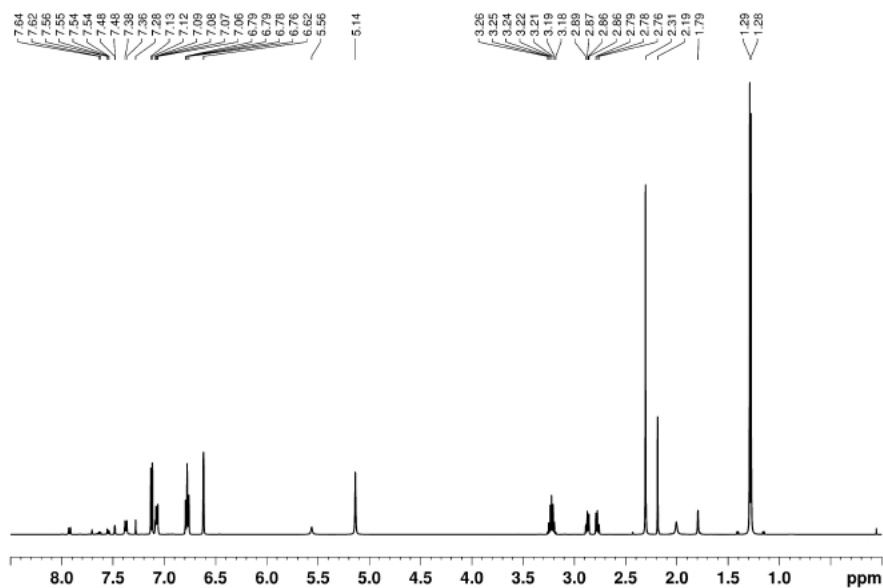

Figure S14. Spectroscopic analysis of 20 wt% of Ultem<sup>®</sup> solution in 4:1 thymol/raspberry ketone. 600 MHz <sup>1</sup>H NMR spectrum.

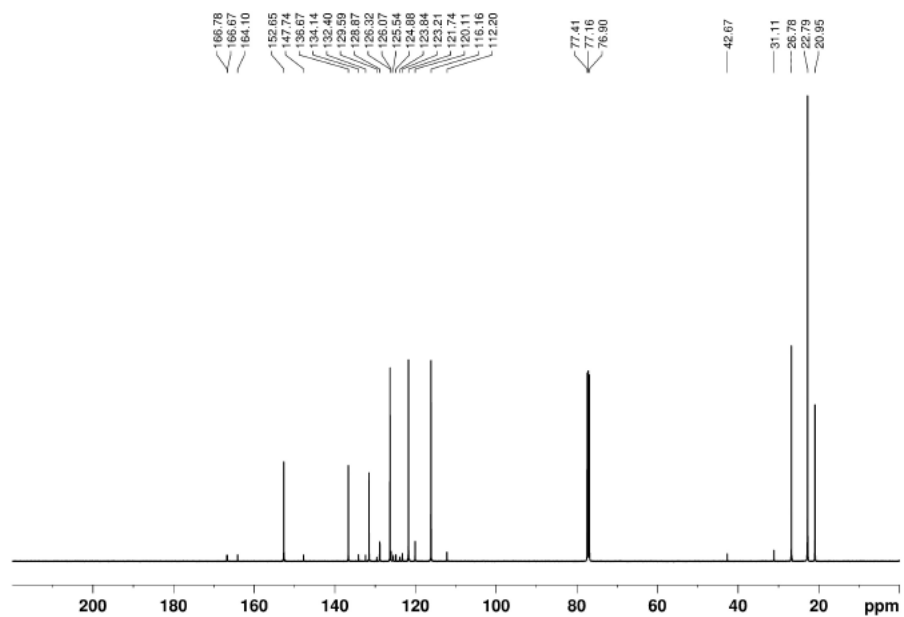

Figure S15. Spectroscopic analysis of 20 wt% of Ultem<sup>®</sup> solution in 4:1 thymol/raspberry ketone. 600 MHz <sup>13</sup>C NMR spectrum.

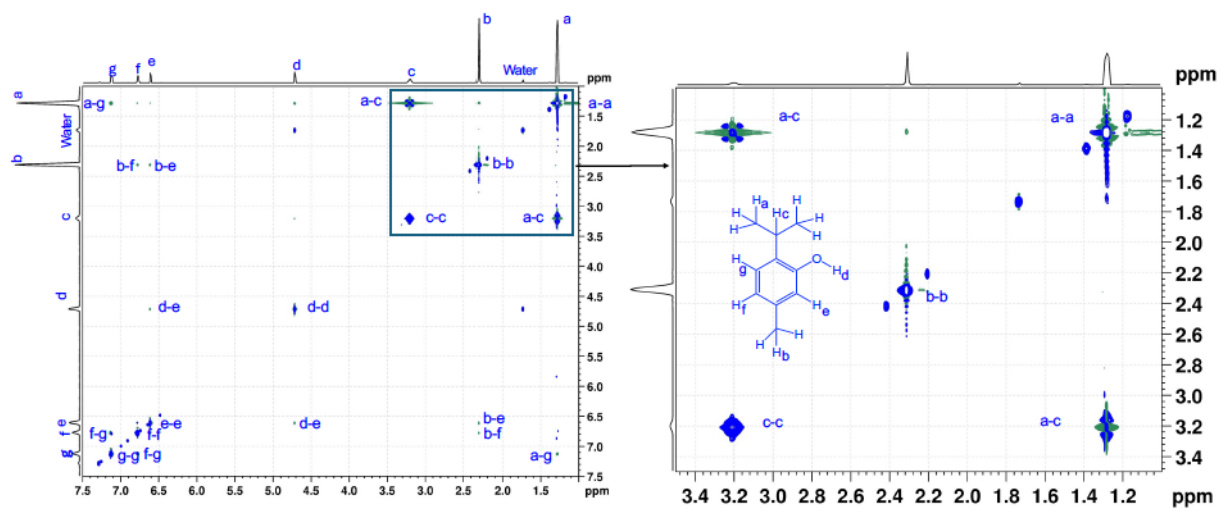

Figure S16. NOESY spectroscopic analysis of thymol. 2D  $^1\text{H}$  NMR NOESY spectrum.



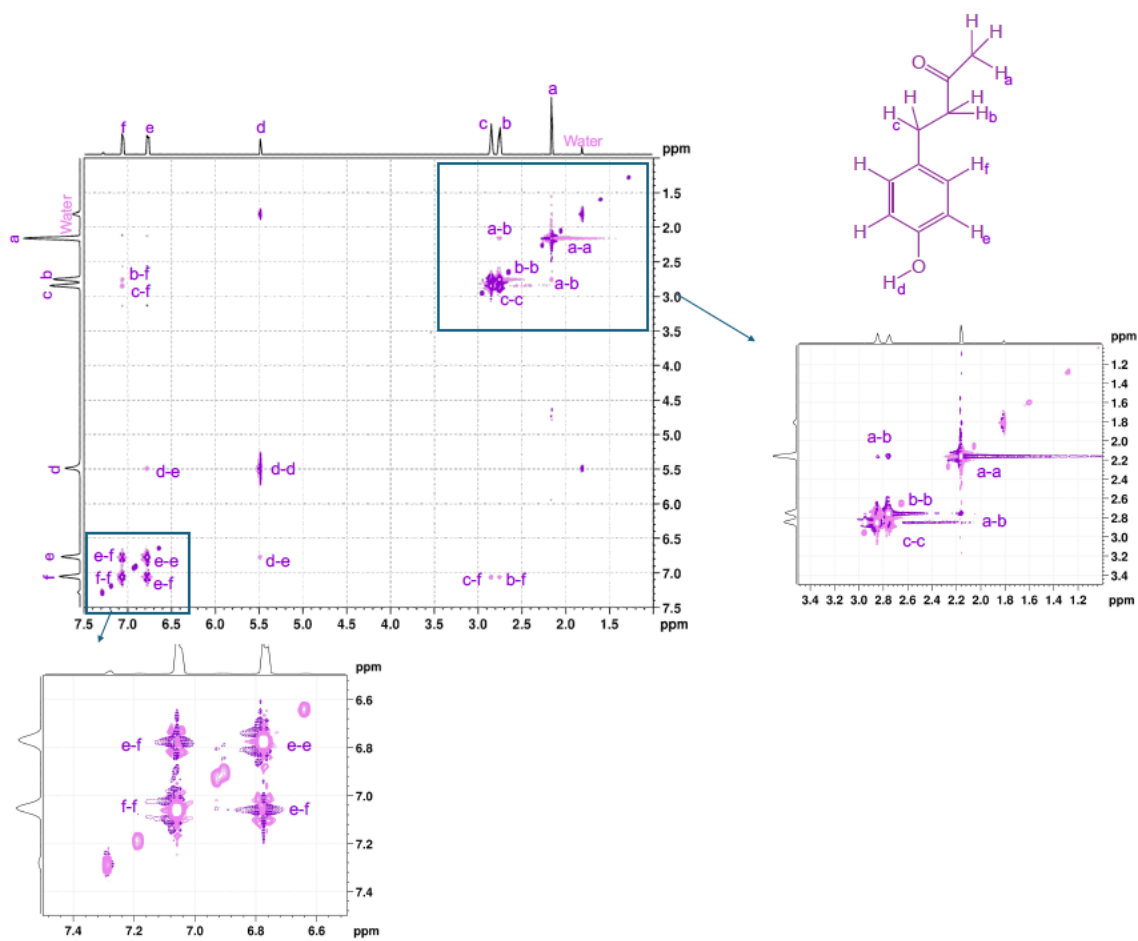

Figure S17. NOESY spectroscopic analysis of raspberry ketone. 2D  $^1\text{H}$  NMR NOESY spectrum.

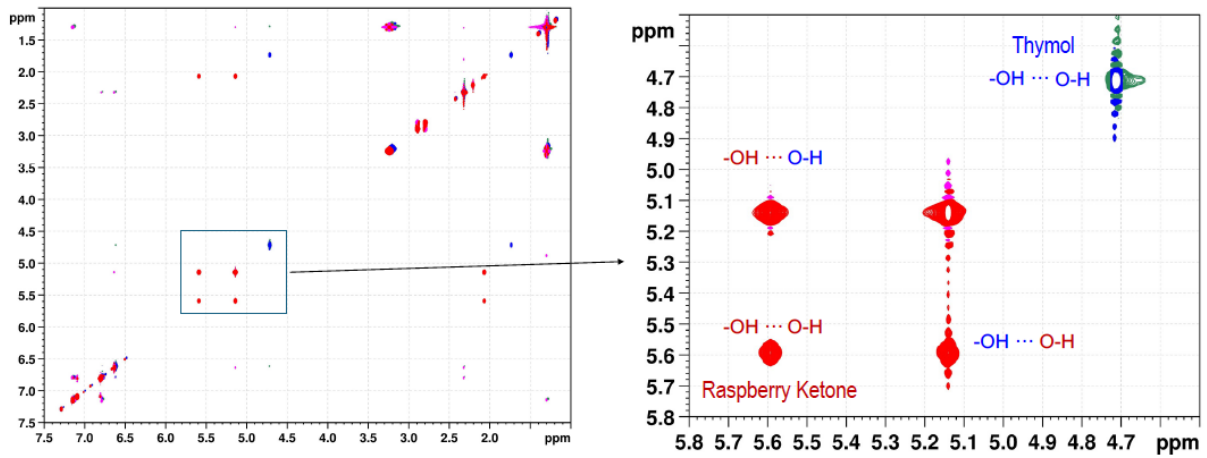

Figure S18. NOESY Spectroscopic analysis of 4:1 thymol/raspberry ketone. 2D  $^1\text{H}$  NMR NOESY spectrum.

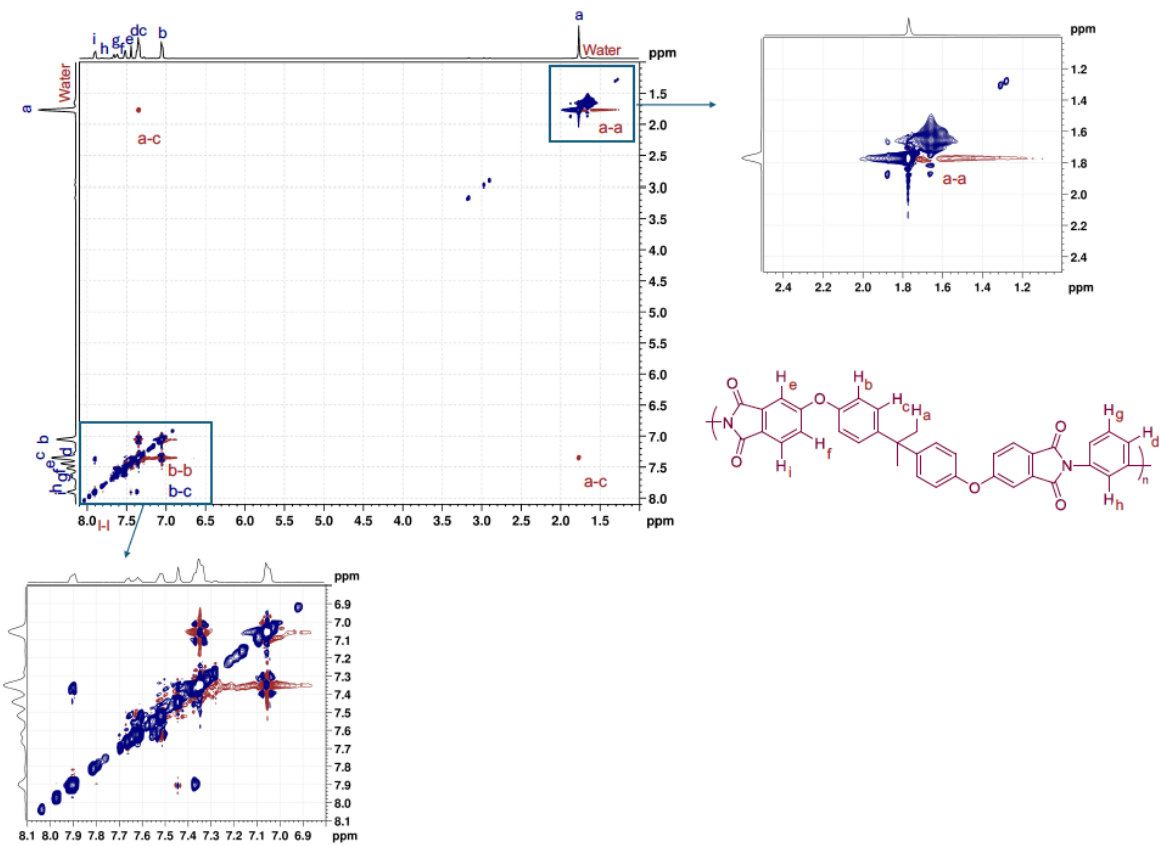

Figure S19. NOESY Spectroscopic analysis of Ultem<sup>®</sup>. 2D  $^1\text{H}$  NMR NOESY spectrum.

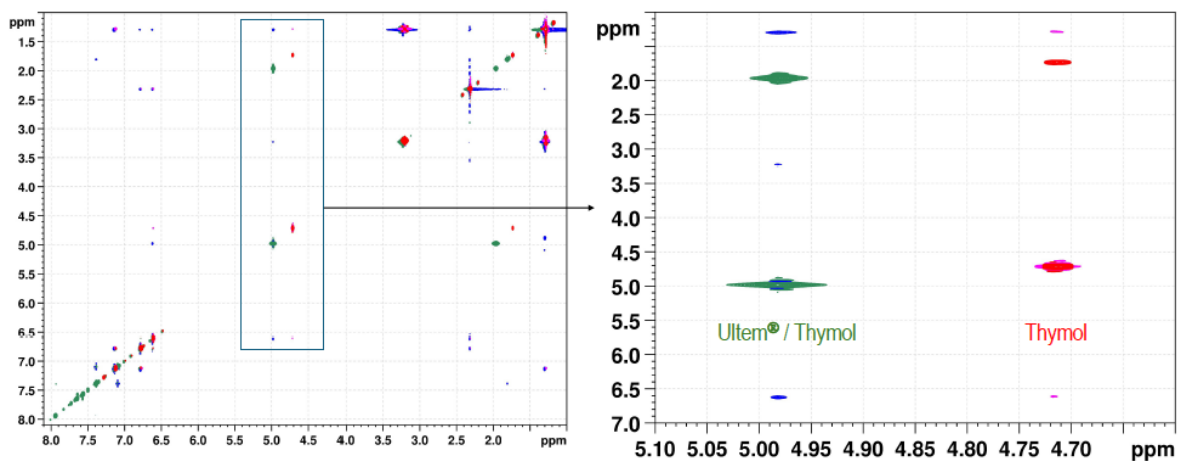

**Figure S20. NOESY Spectroscopic analysis.** The 2D  $^1\text{H}$  NMR NOESY spectrum of Ultem<sup>®</sup> and thymol.

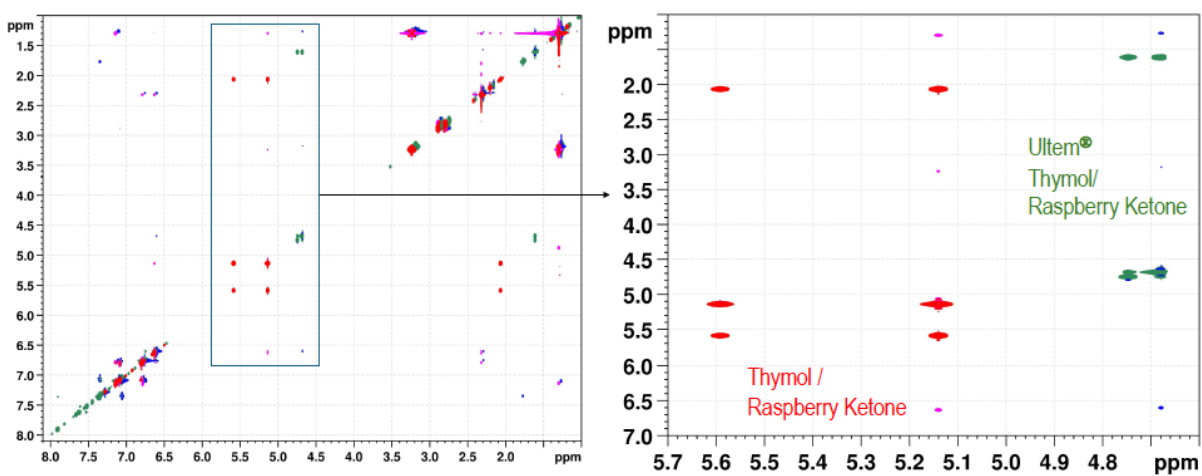

**Figure S21. NOESY Spectroscopic analysis of Ultem<sup>®</sup> solution in 4:1 thymol/ raspberry ketone.** 2D  $^1\text{H}$  NMR NOESY spectrum.

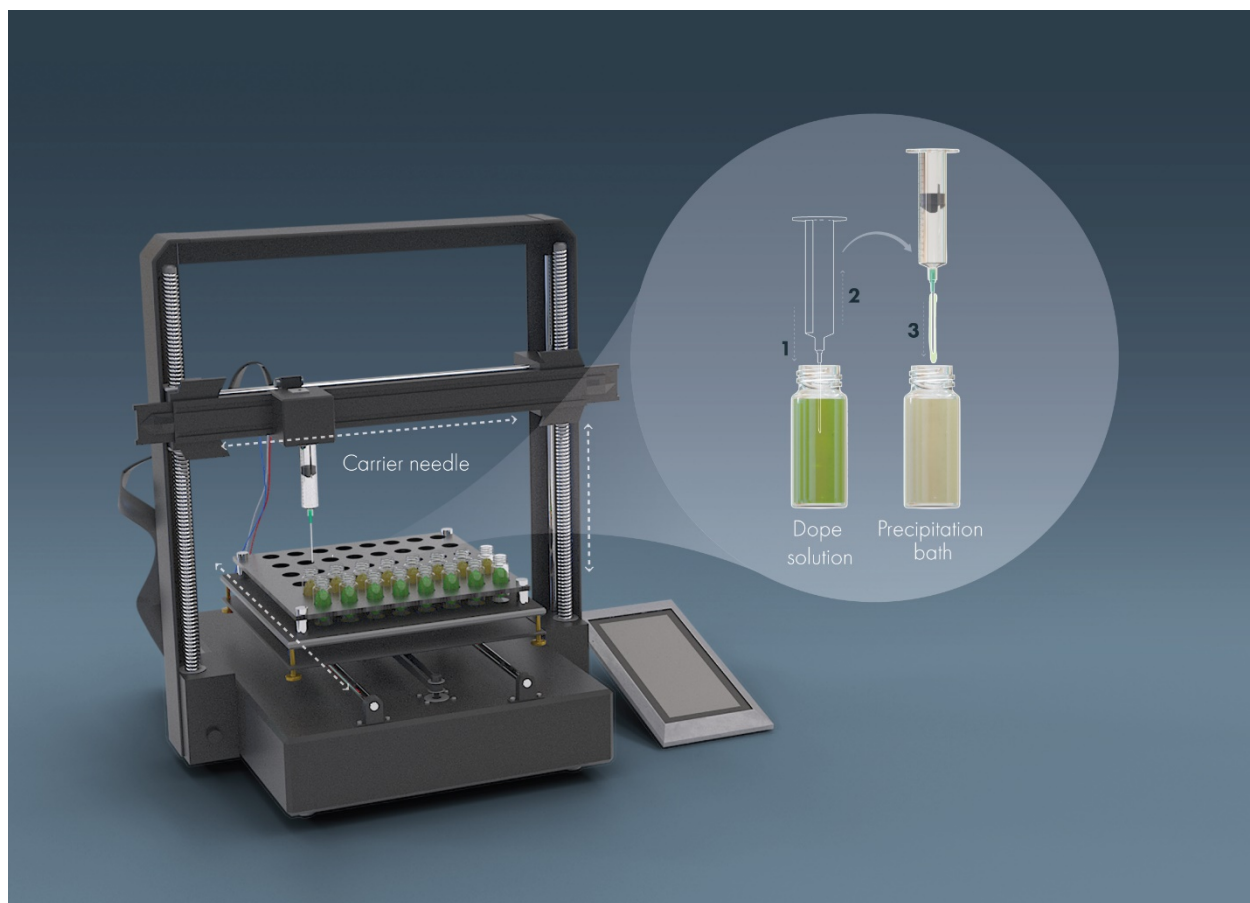

**Figure S22. Automated manipulator.** Schematic representation of high throughput hollow fibre fabrication.

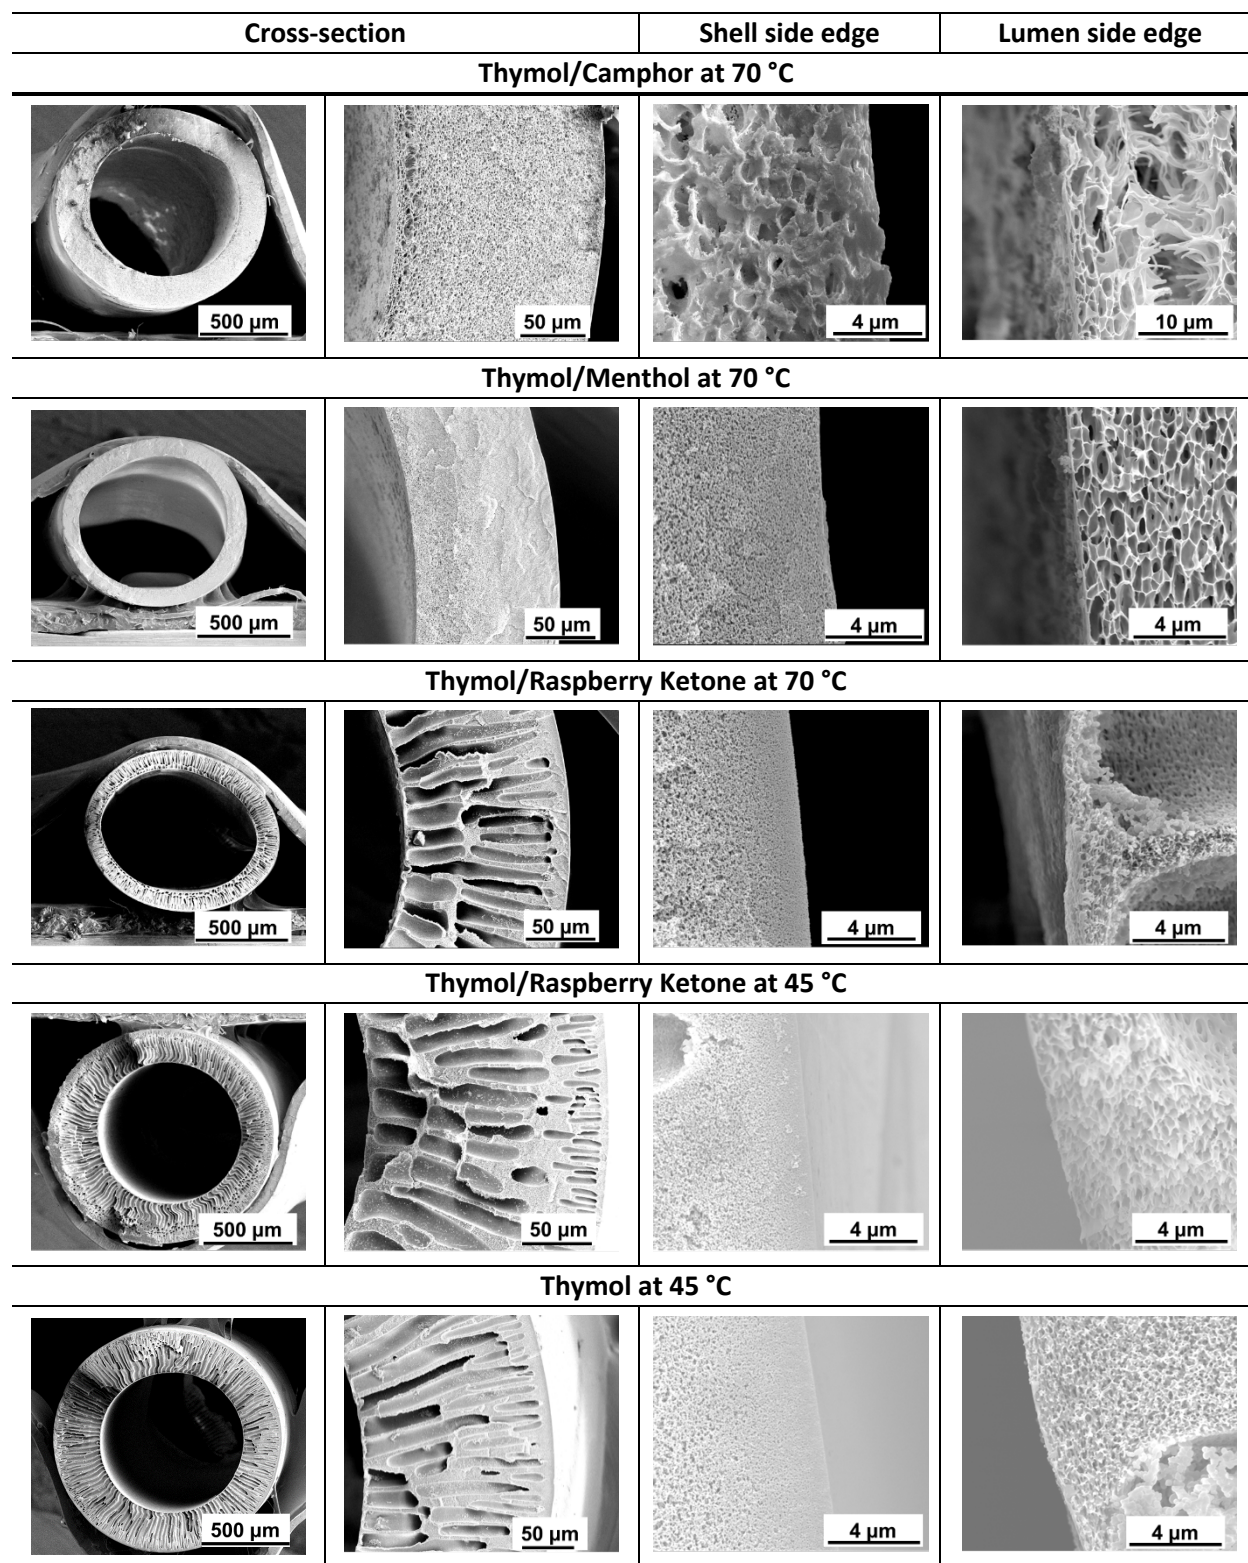

**Figure S23. SEM images of hollow fibres.** Hollow fibres fabricated by the automated manipulator unit using 13 wt% Ultem<sup>®</sup> dope solutions in thymol or 4:1 molar mixtures of thymol and a second natural component. Coagulation in 100% ethanol.

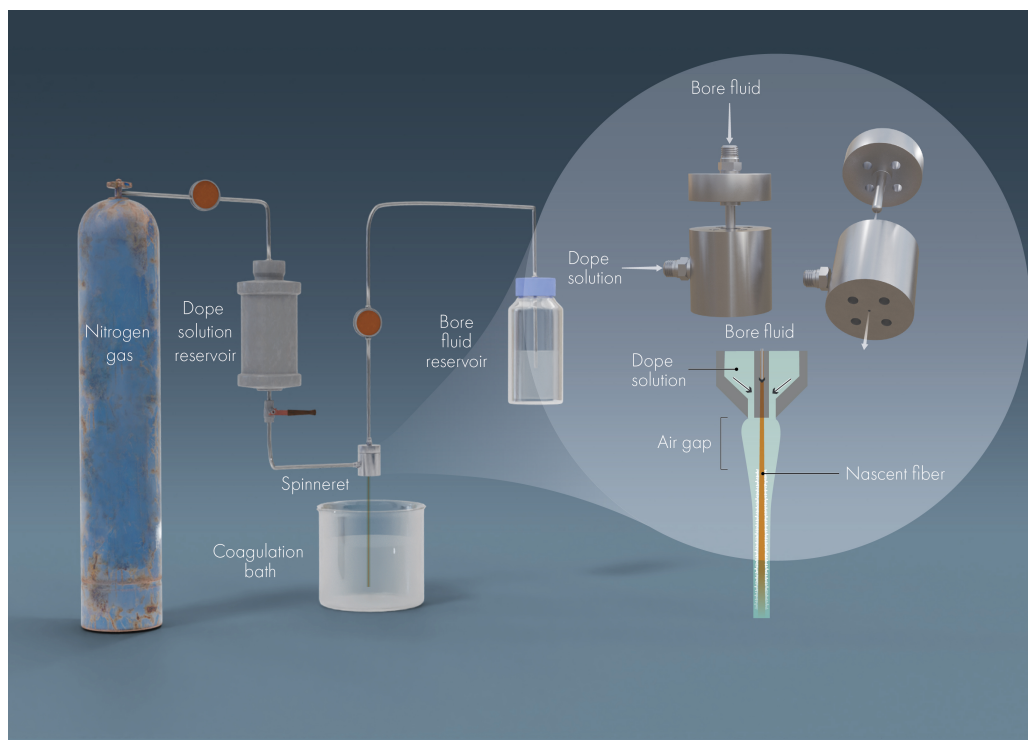

**Figure S24.** Schematic representation of hollow fibre fabrication by dry-jet wet spinning unit.

**Table S5.** Conditions for Ultem® hollow fibre spinning.

| <b>Solvent</b>                                  | <b>Thymol</b>                |      | <b>Thymol/Raspberry Ketone</b> |      | <b>NMP</b> |
|-------------------------------------------------|------------------------------|------|--------------------------------|------|------------|
| Dope Ultem® conc. (wt%)                         | 16                           | 20   | 16                             | 20   | 20         |
| Dope solution temperature (°C)                  | 45                           | 45   | 45                             | 45   | 25         |
| Dope solution pressure (bar)                    | 1.5                          | 3.3  | 1,5                            | 3.3  | 1.2        |
| Air gap (cm)                                    | 1; 3; 8                      | 3    | 1; 3; 8                        | 3    | 3          |
| External coagulant                              | Ethanol<br>1:1 Ethanol/Water |      | Ethanol<br>1:1 Ethanol/Water   |      | Water      |
| Bore fluid                                      | Ethanol                      |      | Ethanol                        |      | Water      |
| Bore fluid flow rate<br>(mL min <sup>-1</sup> ) | 0.6; 1.5; 3; 6               | 3; 6 | 0.6; 1.5; 3; 6                 | 3; 6 | 6          |
| Bore fluid temperature (°C)                     | 22                           | 22   | 22                             | 22   | 22         |



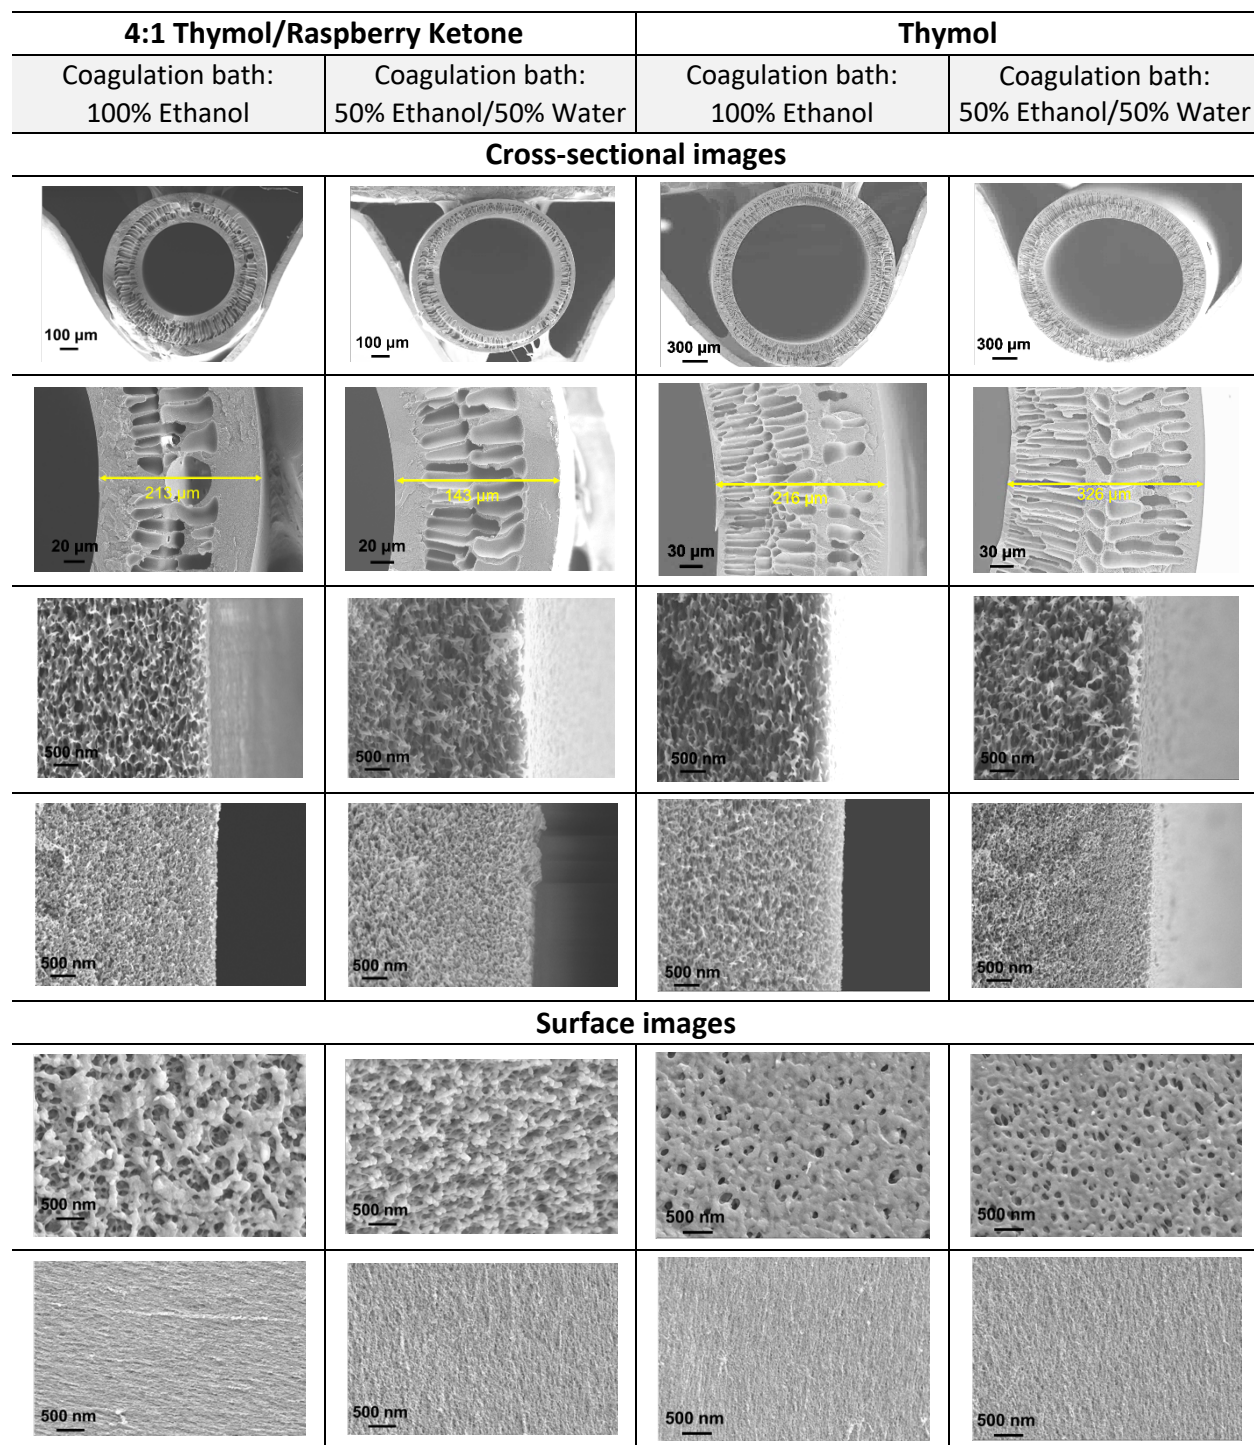

**Figure S25. SEM images of hollow fibres.** Hollow fibres fabricated by dry-jet wet spinning using 16 wt% Ultem<sup>®</sup> dope solutions in thymol or 4:1 thymol/raspberry ketone. Bore fluid flow rate of 3 mL min<sup>-1</sup> and air gap of 3 cm.



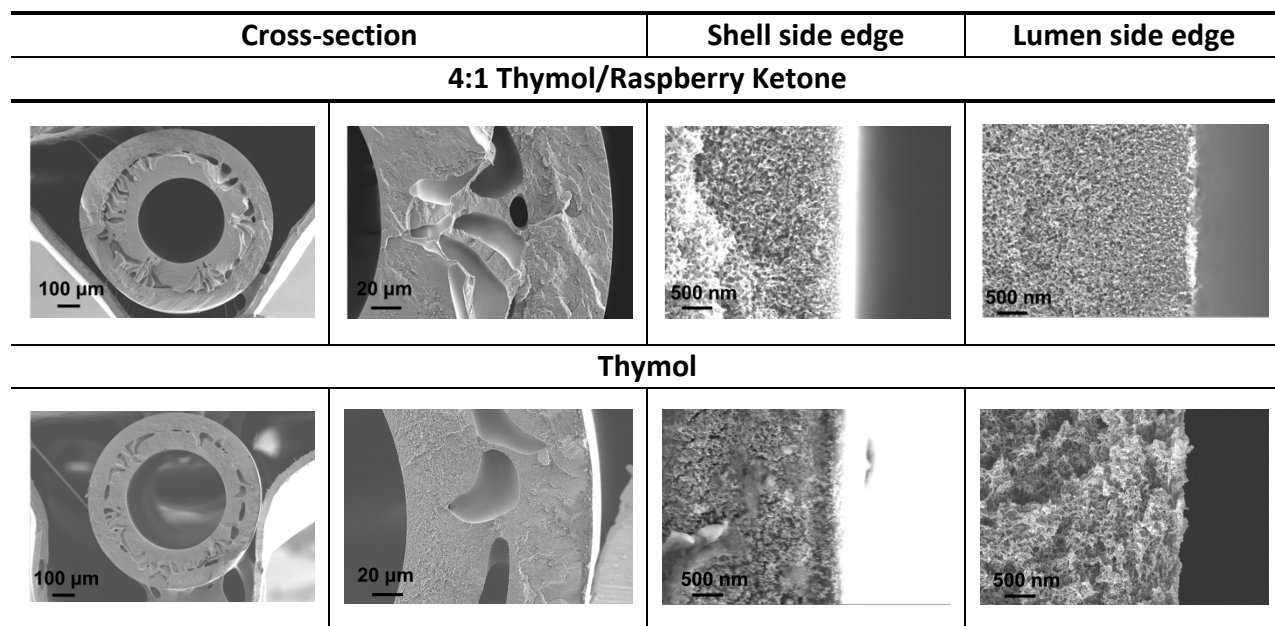

**Figure S26. SEM images of hollow fibres.** Hollow fibres fabricated by dry-jet wet spinning using 20 wt% Ultem<sup>®</sup> dope solution in thymol or 4:1 thymol/raspberry. Bore fluid flow rate of 6 mL min<sup>-1</sup> and air gap of 3 cm. Coagulation bath: 100% ethanol.

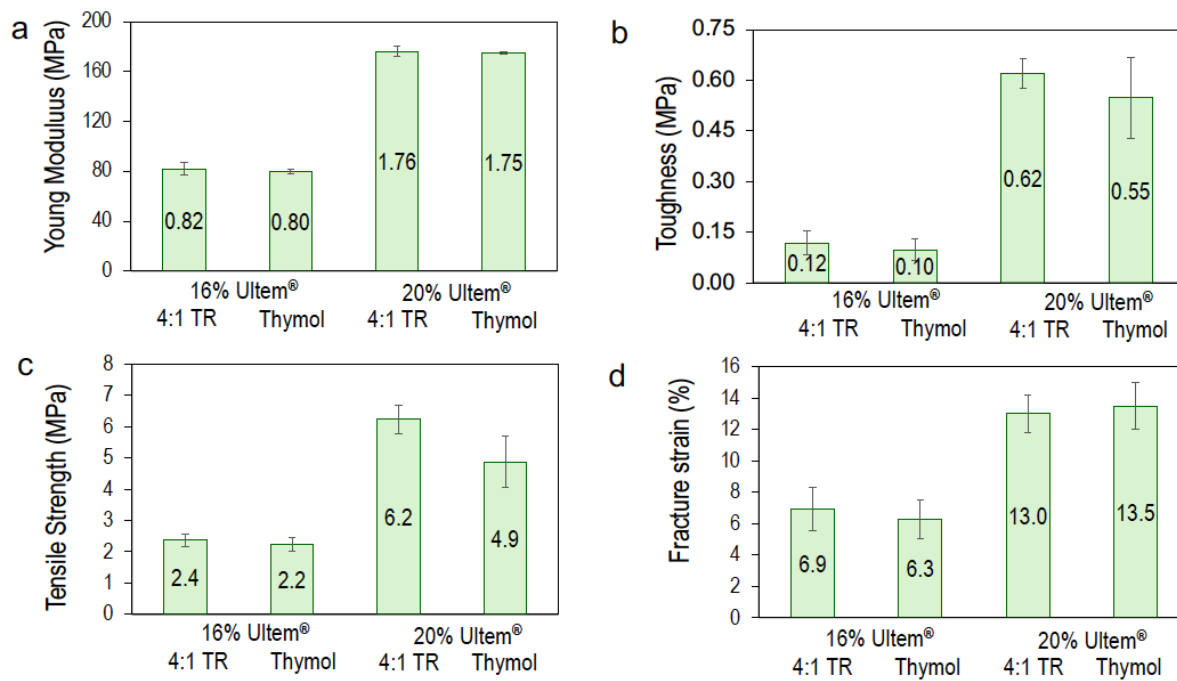

**Figure S27. Mechanical properties.** Hollow fibres fabricated in a continuous spinning machine by using Ultem® dope solutions in thymol and 4:1 thymol/raspberry ketone.

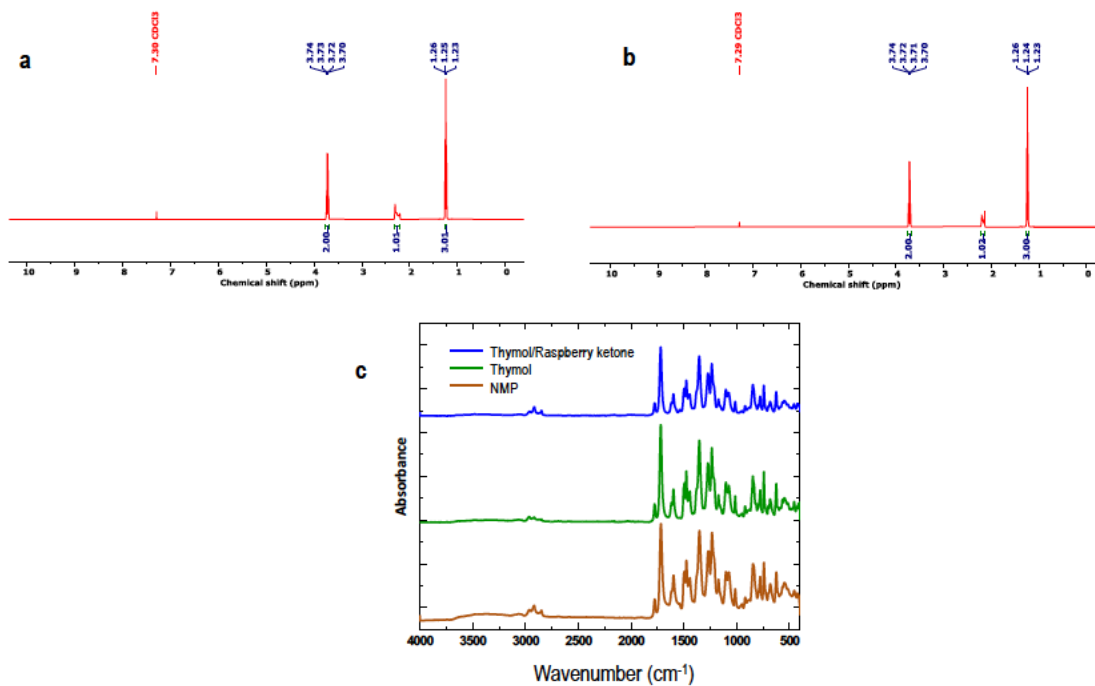

**Figure S28. Spectroscopic confirmation that thymol was not present after the hollow fibers preparation.**  $^1\text{H}$  NMR spectrum of **a**, pure ethanol and **b**, (2.58 g) ethanol exposed to (0.0129 g) hollow fibers for 72 h. **c**, FTIR spectrum of fibers fabricated from dope solutions in different solvents (4:1 thymol/raspberry ketone, thymol and NMP).

**Table S6.** Water vapour permeability and selectivity ( $H_2O/N_2$ ) of hollow fibres prepared with 16 wt% Ultem® dope solution in thymol or 4:1 thymol/raspberry ketone, coagulated in 50% ethanol / 50% water, and coated with tannic acid (TA), sodium periodate ( $NaIO_4$ ) and hyperbranched polyethyleneimine (PEI).

| Coating type                    | Water vapor permeance (GPU) | $H_2O/N_2$ Selectivity | Mode   | Temperature (°C) |
|---------------------------------|-----------------------------|------------------------|--------|------------------|
| 4:1 Thymol/Raspberry Ketone     |                             |                        |        |                  |
| No Coating                      | 16,453                      | 12.3                   | Vacuum | 25.0             |
| TA-10, $NaIO_4$ -10 min         | 11,001                      | 658                    | Vacuum | 25.0             |
| TA-10, $NaIO_4$ -10, PEI 15 min | 6,134                       | 53,453                 | Vacuum | 25.0             |
| TA-10, $NaIO_4$ -10, PEI 15 min | 4,566                       | 44,654                 | Sweep  | 25.0             |
| TA-10, $NaIO_4$ -10, PEI 15 min | 5,678                       | 49,365                 | Vacuum | 32.5             |
| TA-10, $NaIO_4$ -10, PEI 15 min | 4,056                       | 42,453                 | Sweep  | 32.5             |
| TA-10, $NaIO_4$ -10, PEI 15 min | 5,453                       | 45,611                 | Vacuum | 35.0             |
| Thymol                          |                             |                        |        |                  |
| No Coating                      | 28,633                      | 11.5                   | Vacuum | 25.0             |
| TA-10, $NaIO_4$ -10 min         | 12,385                      | 555                    | Vacuum | 25.0             |
| TA-10, $NaIO_4$ -10, PEI 15 min | 6,689                       | 49,385                 | Vacuum | 25.0             |
| TA-10, $NaIO_4$ -10, PEI 15 min | 4,989                       | 42,441                 | Sweep  | 25.0             |
| TA-10, $NaIO_4$ -10, PEI 15 min | 6,034                       | 48,108                 | Vacuum | 32.5             |
| TA-10, $NaIO_4$ -10, PEI 15 min | 4,554                       | 40,005                 | Sweep  | 32.5             |
| TA-10, $NaIO_4$ -10, PEI 15 min | 5,766                       | 44,339                 | Vacuum | 35.0             |
